# Supplementary material for: Dendronised diazapyrenium derivatives: host–guest complexes in aqueous solution
Source: Royal Society of Chemistry journal article supplement (doi:10.1039/c8nj03828g), 2018-01-01
Supplement: c8nj03828g1.pdf [file c8nj03828g1.pdf]

## **Dendronised diazapyrenium derivatives: host-guest complexes in aqueous solution**

Jennifer K. Molloy, Giacomo Bergamini, Massimo Baroncini, Uwe Hahn and Paola Ceroni

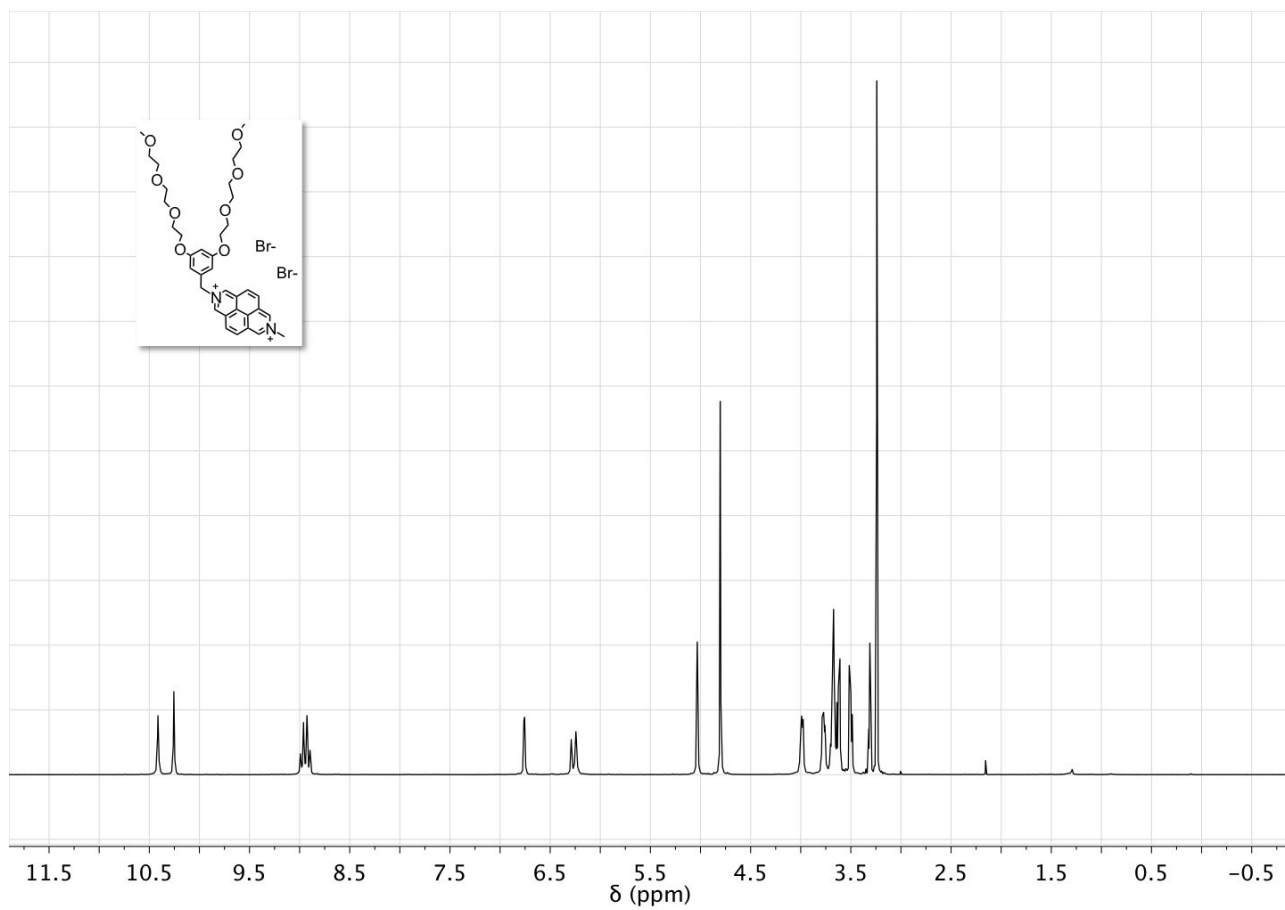

**Figure S1a.**  $^1\text{H}$  NMR (300 MHz,  $\text{CD}_3\text{OD}$ ,  $25^\circ\text{C}$ ) spectrum of **DAPG1<sup>2+</sup>**.

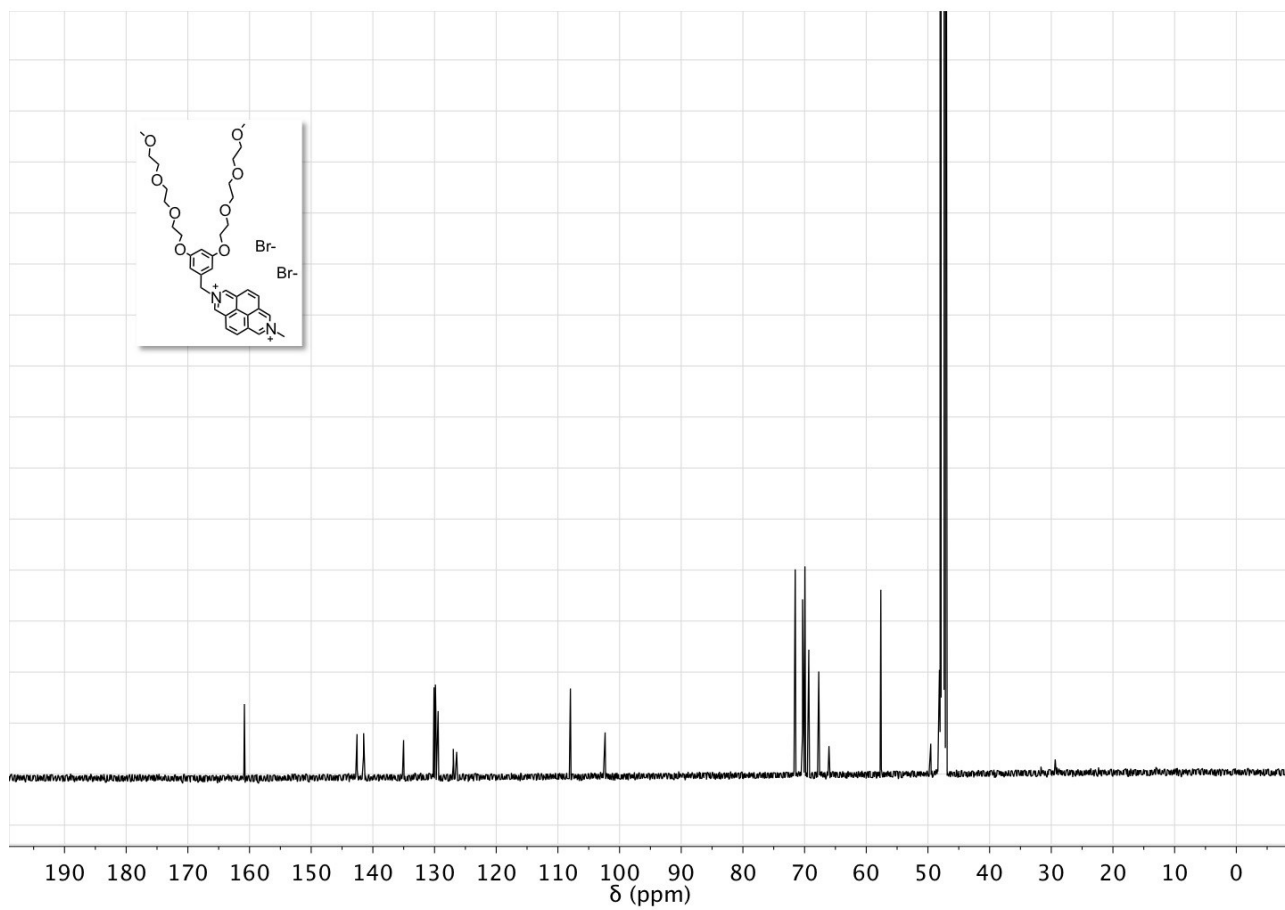

**Figure S1b.**  $^{13}\text{C}$  NMR (75 MHz,  $\text{CD}_3\text{OD}$ ,  $25^\circ\text{C}$ ) spectrum of **DAPG1<sup>2+</sup>**.

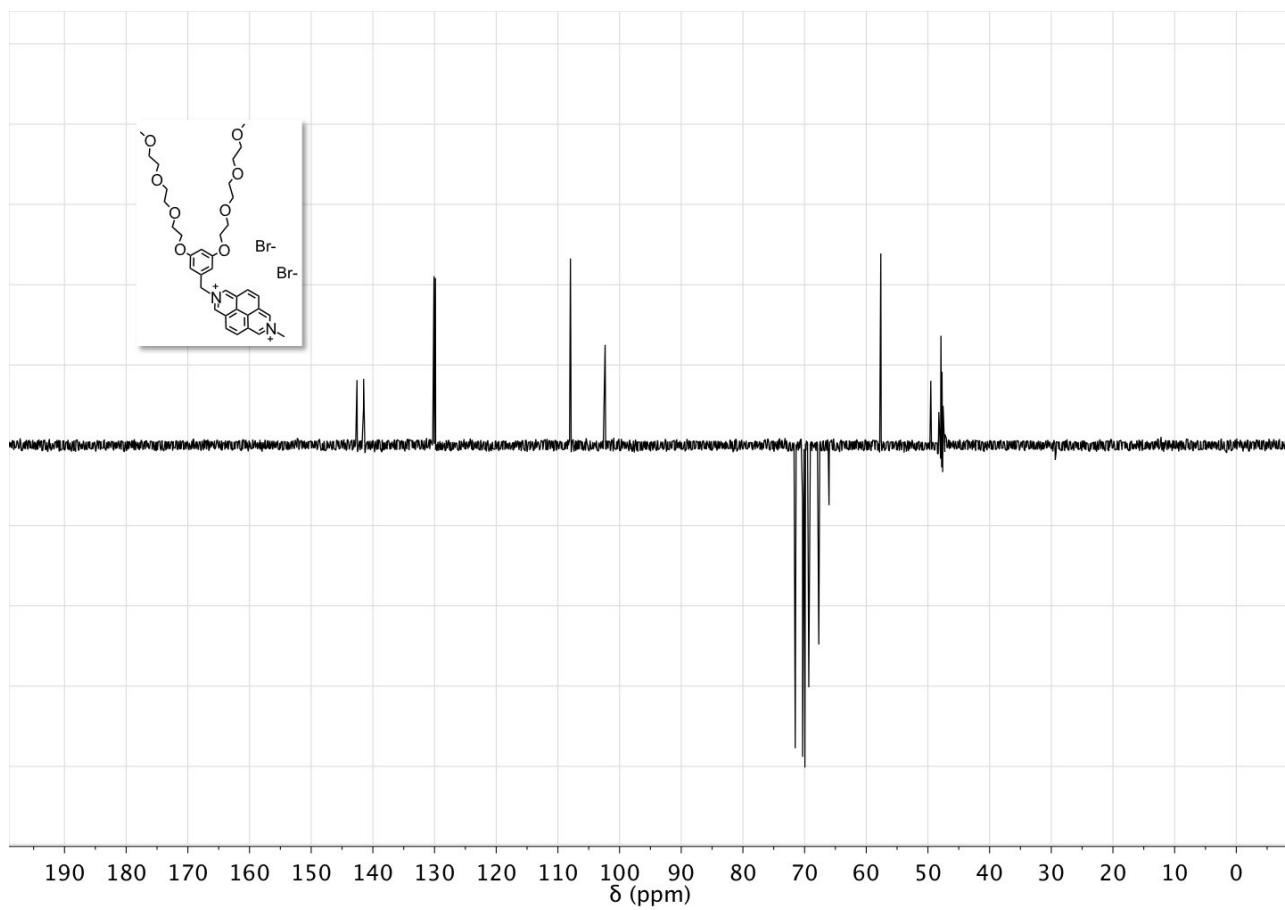

**Figure S1c.** DEPT135 NMR (75 MHz, CD<sub>3</sub>OD, 25°C) spectrum of **DAPG1<sup>2+</sup>**.

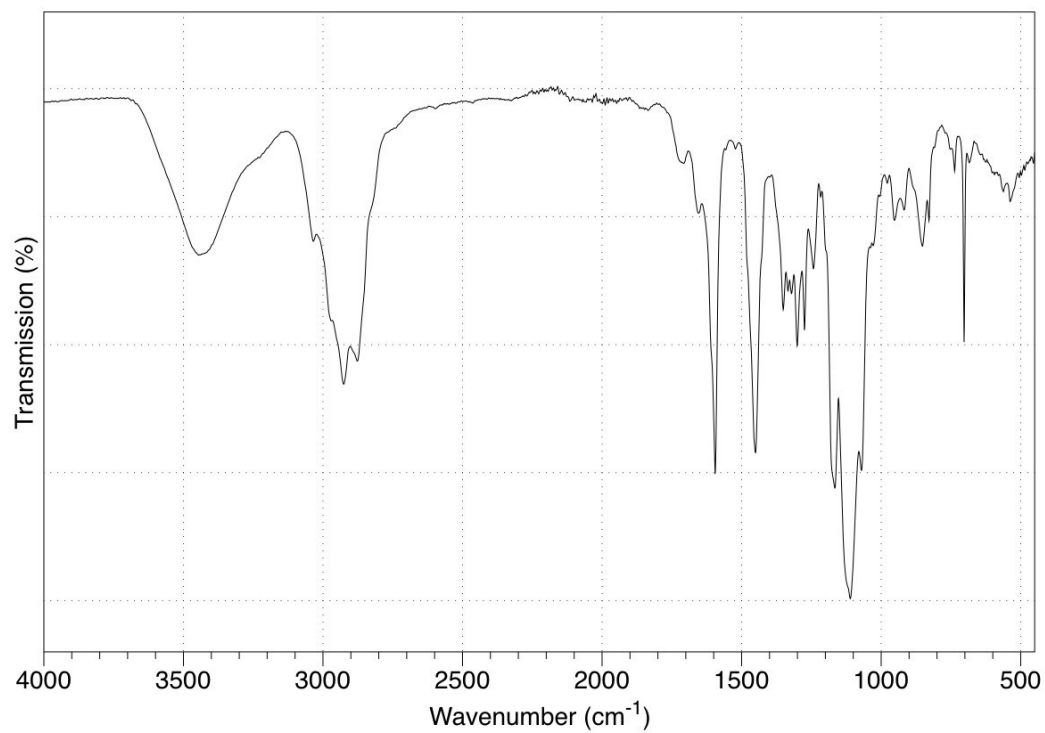

**Figure S1d.** IR spectrum (neat) of **DAPG1<sup>2+</sup>**.

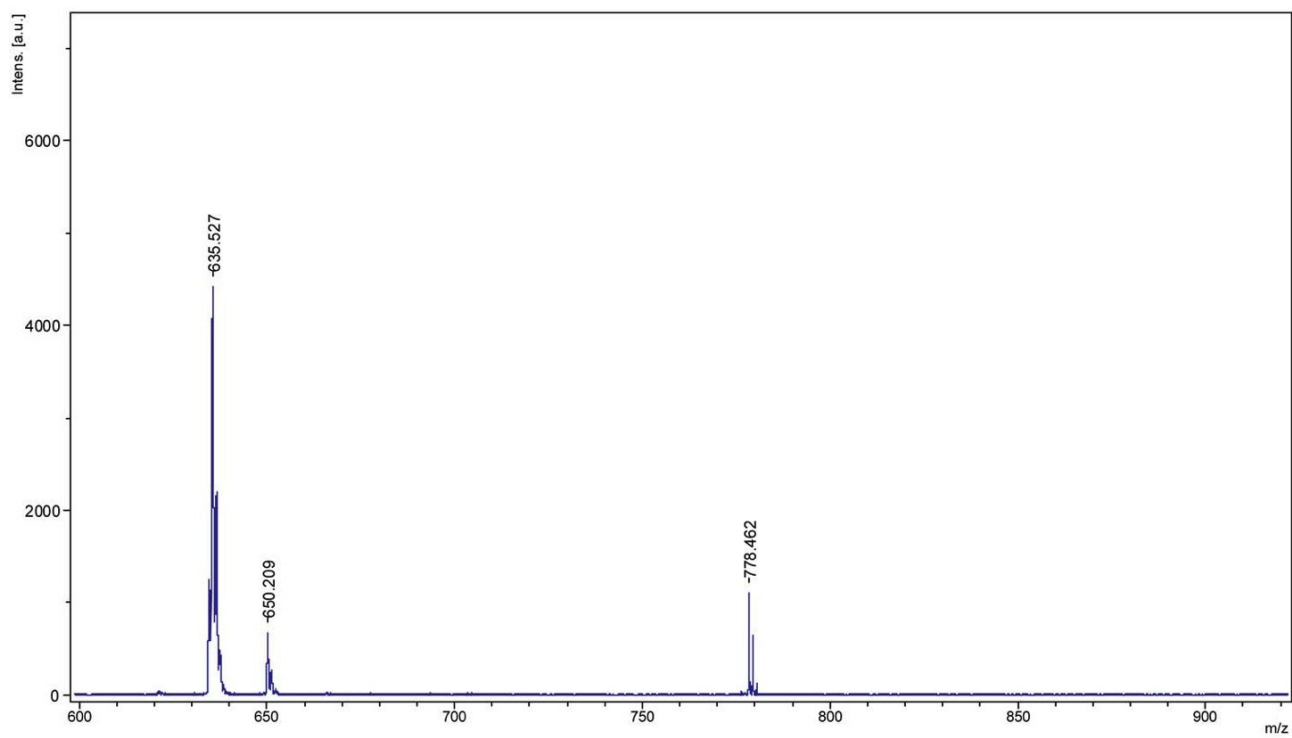

**Figure S1e.** MALDI-TOF mass spectrum of **DAPG1<sup>2+</sup>**.

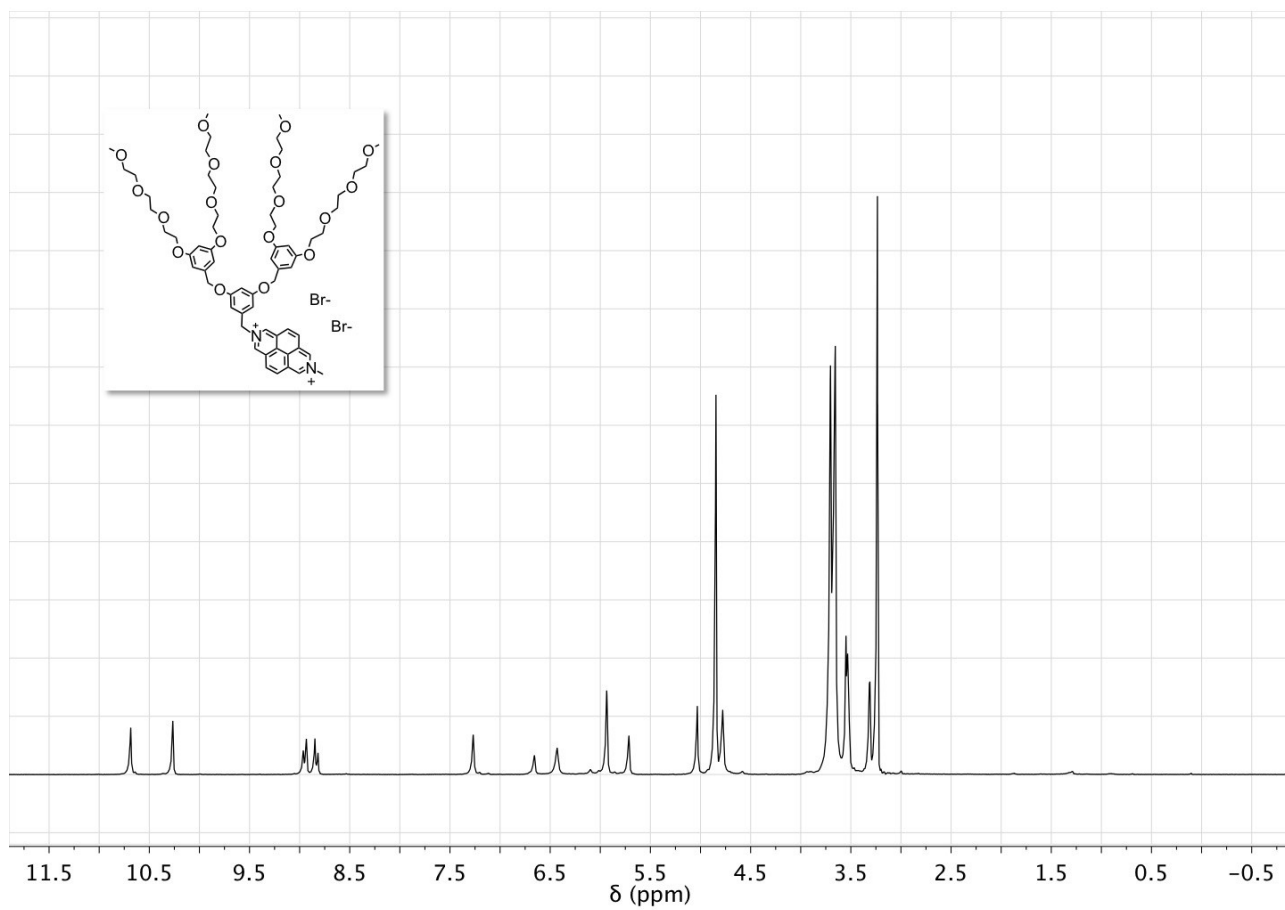

**Figure S2a.** <sup>1</sup>H NMR (300 MHz, CD<sub>3</sub>OD, 25°C) spectrum of **DAPG2<sup>2+</sup>**.

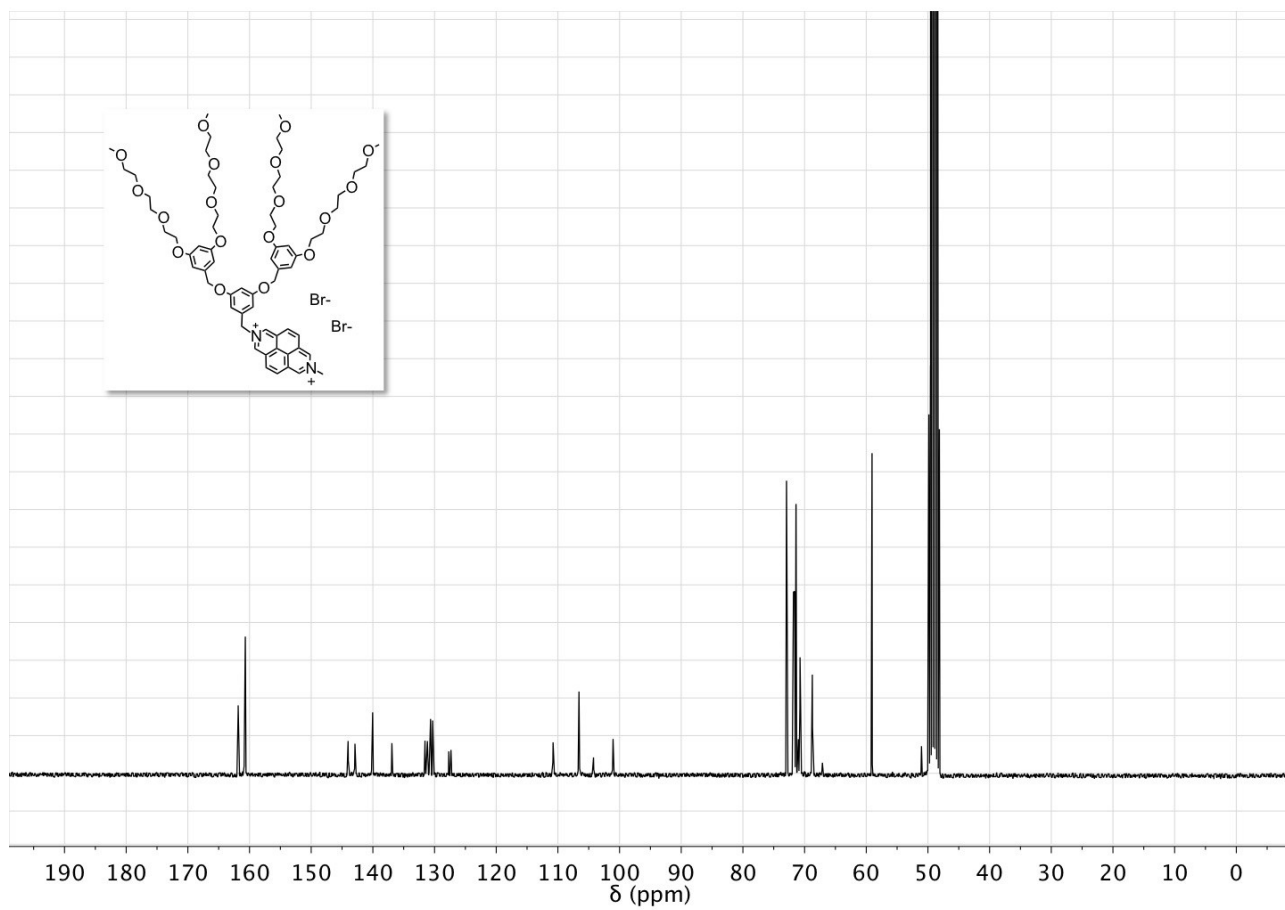

**Figure S2b.** <sup>13</sup>C NMR (75 MHz, CD<sub>3</sub>OD, 25°C) spectrum of **DAPG2<sup>2+</sup>**.



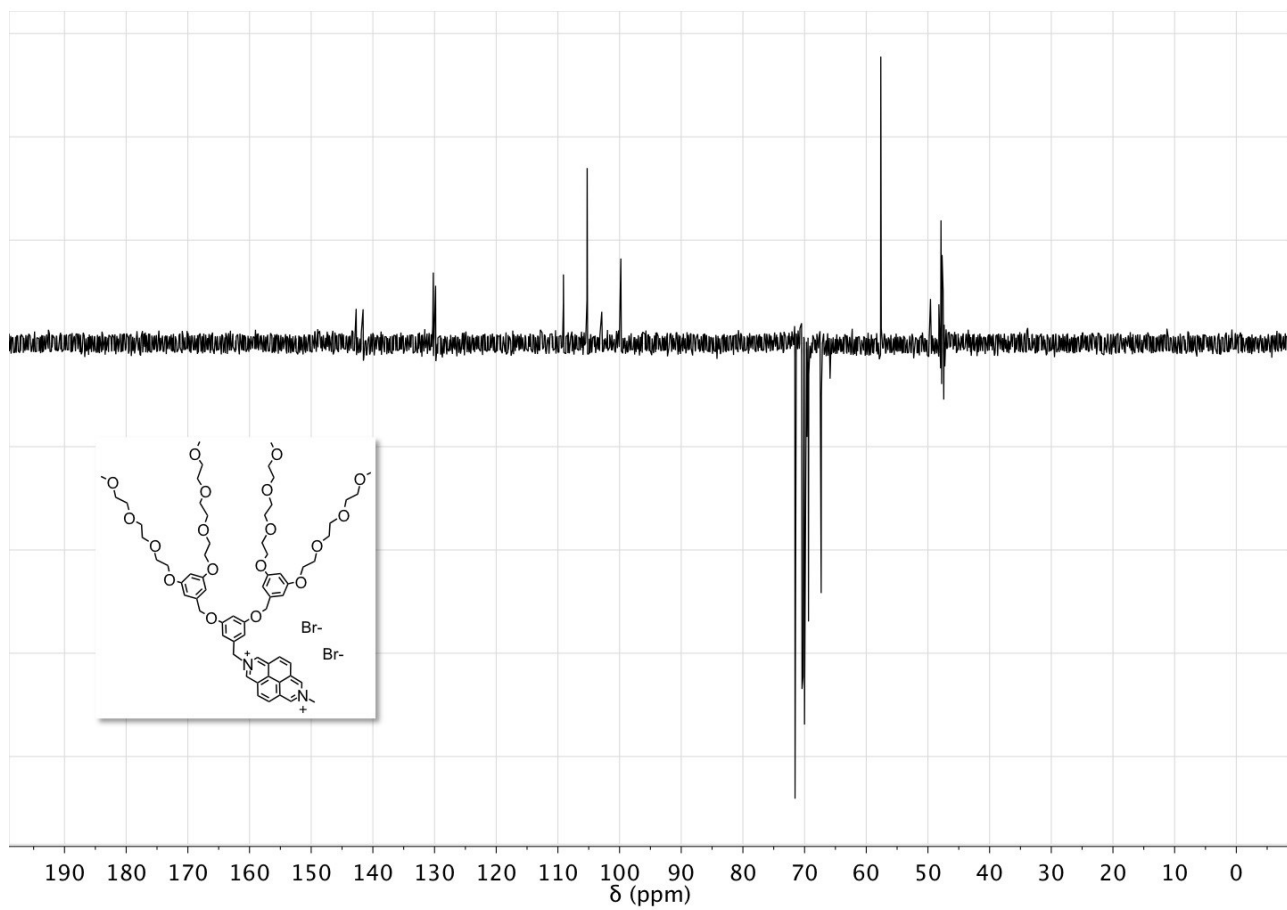

**Figure S2c.** DEPT135 NMR (75 MHz, CD<sub>3</sub>OD, 25°C) spectrum of **DAPG2<sup>2+</sup>**.

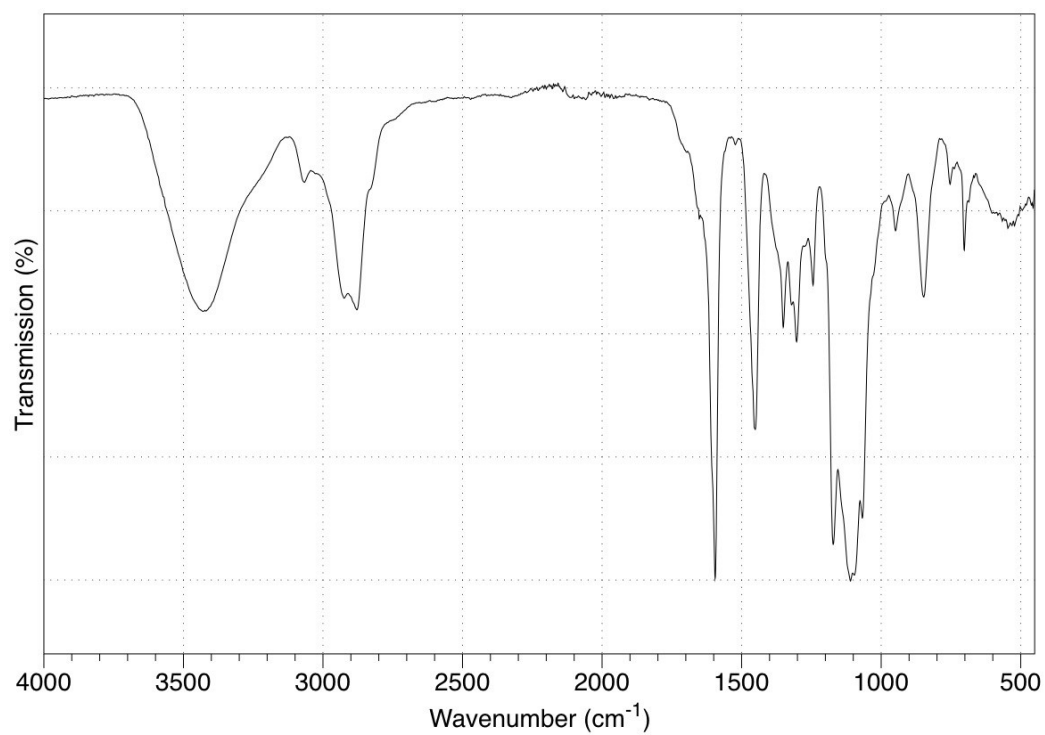

**Figure S2d.** IR spectrum (neat) of **DAPG2<sup>2+</sup>**.

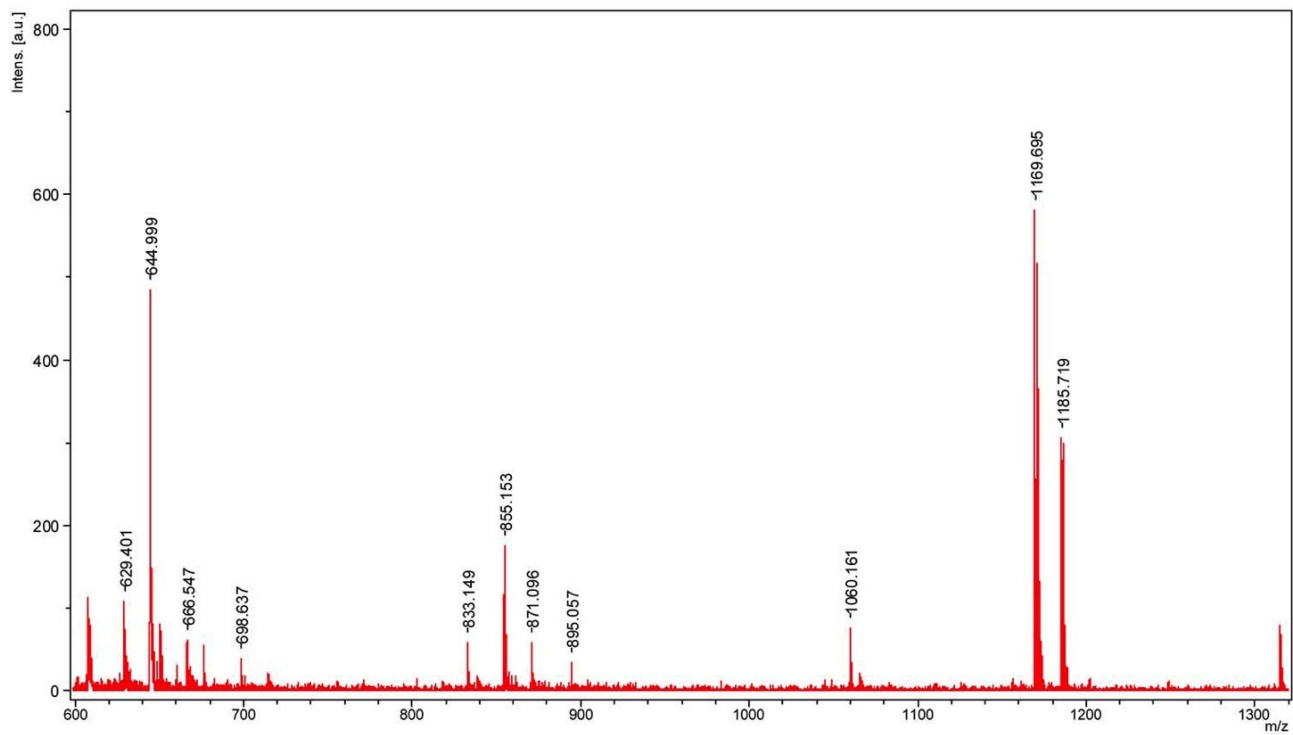

**Figure S2e.** MALDI-TOF mass spectrum of **DAPG2<sup>2+</sup>**.

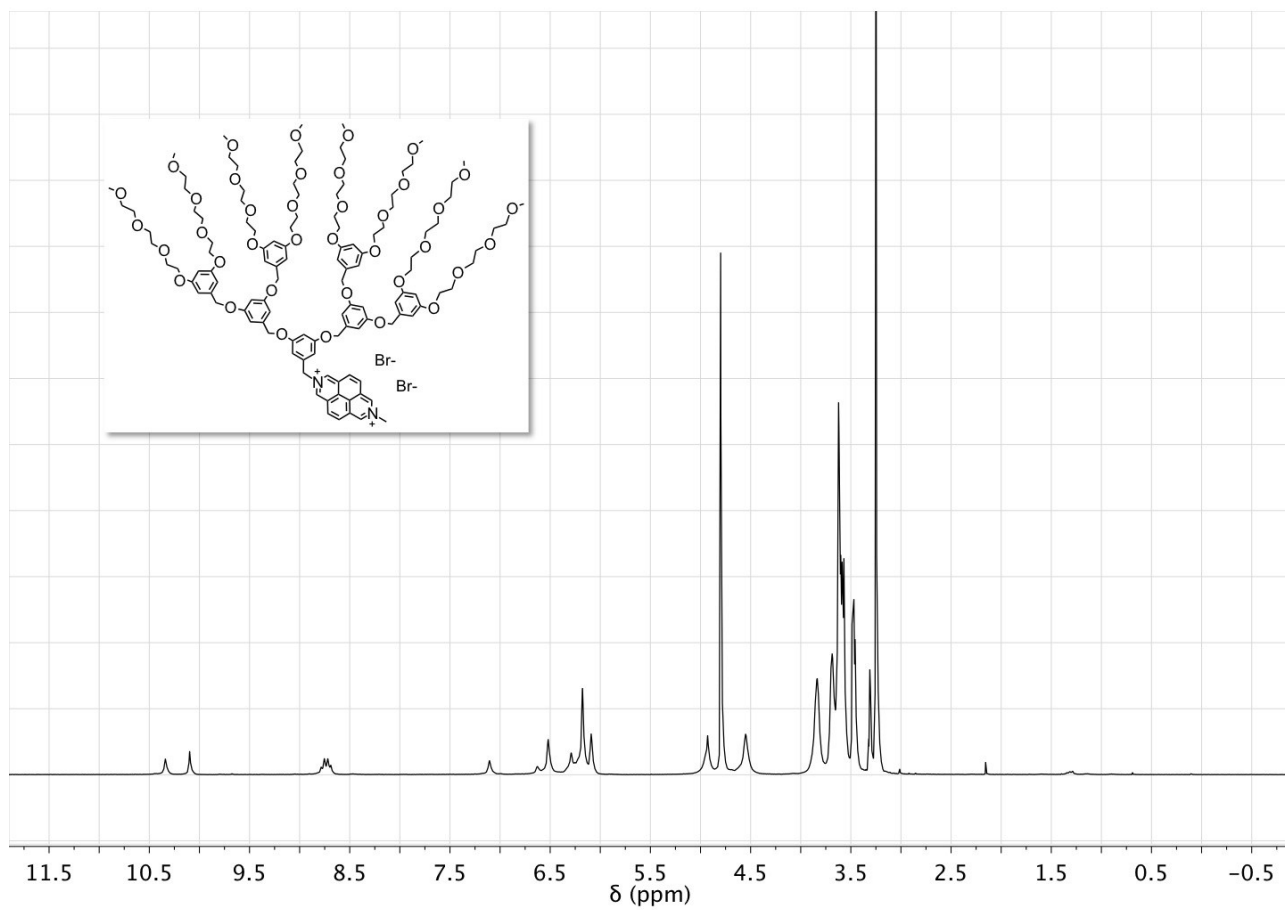

**Figure S3a.**  $^1\text{H}$  NMR (300 MHz,  $\text{CD}_3\text{OD}$ , 25°C) spectrum of **DAPG3<sup>2+</sup>**.

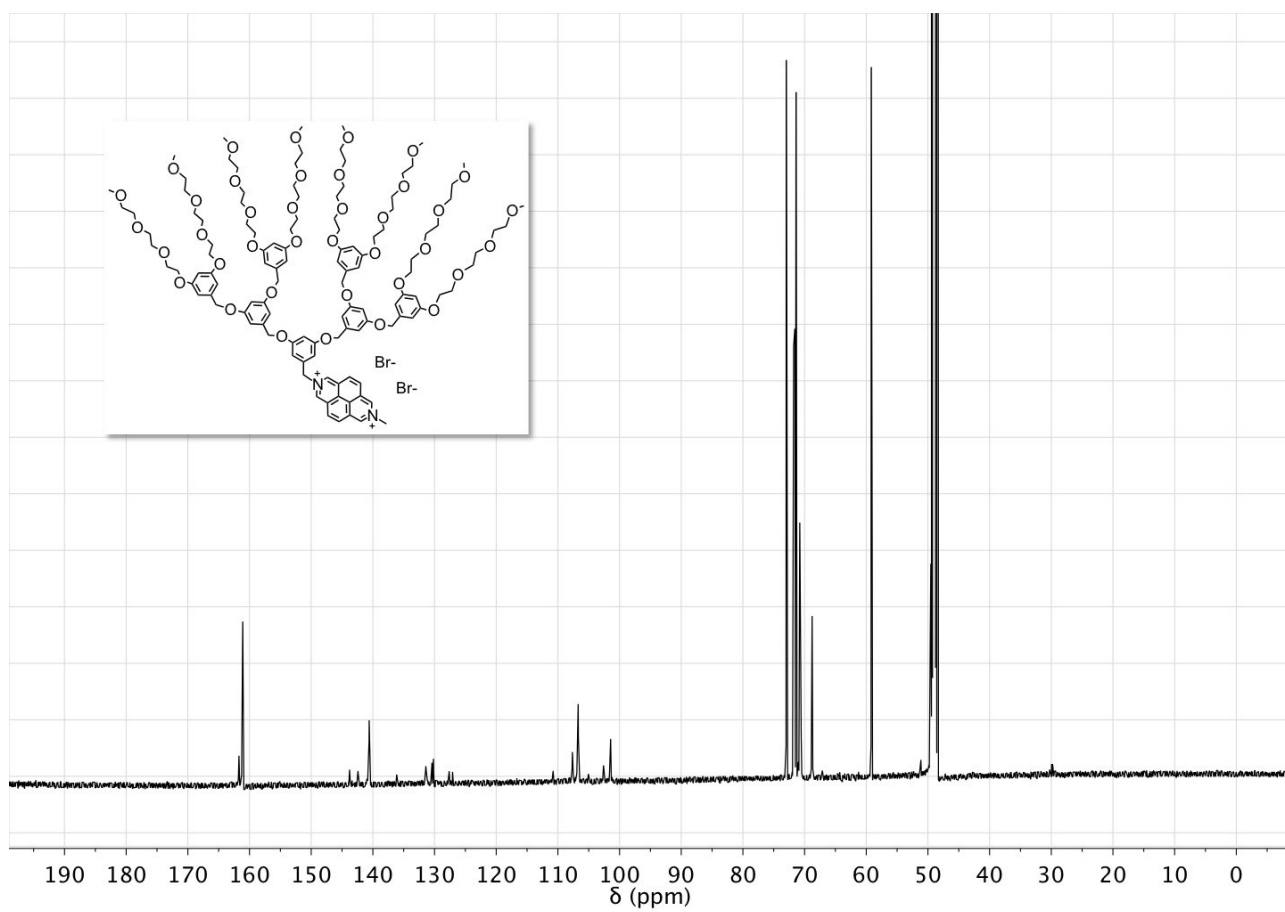

**Figure S3b.**  $^{13}\text{C}$  NMR (75 MHz,  $\text{CD}_3\text{OD}$ ,  $25^\circ\text{C}$ ) spectrum of **DAPG3<sup>2+</sup>**.

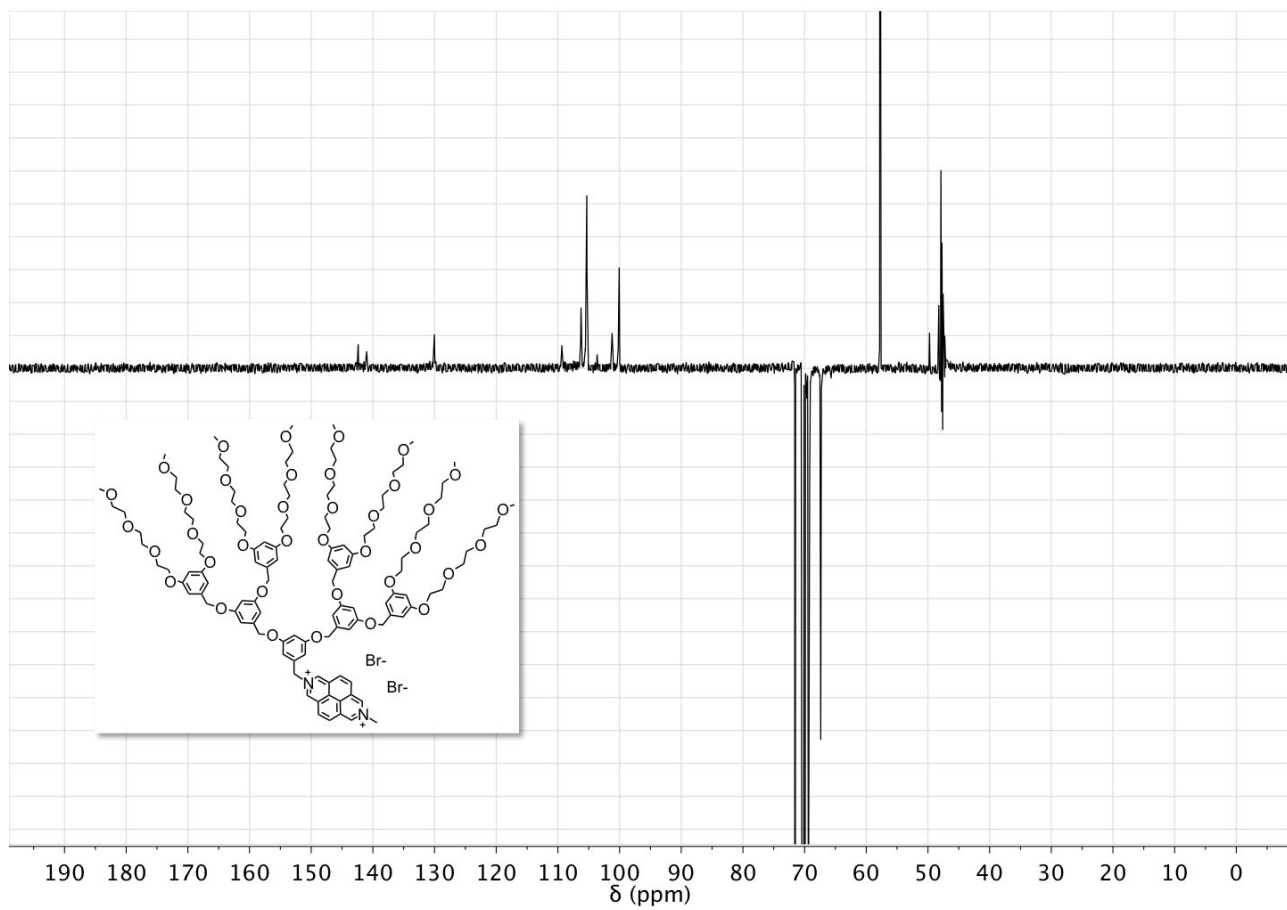

**Figure S3c.** DEPT135 NMR (75 MHz, CD<sub>3</sub>OD, 25°C) spectrum of **DAPG3<sup>2+</sup>**.

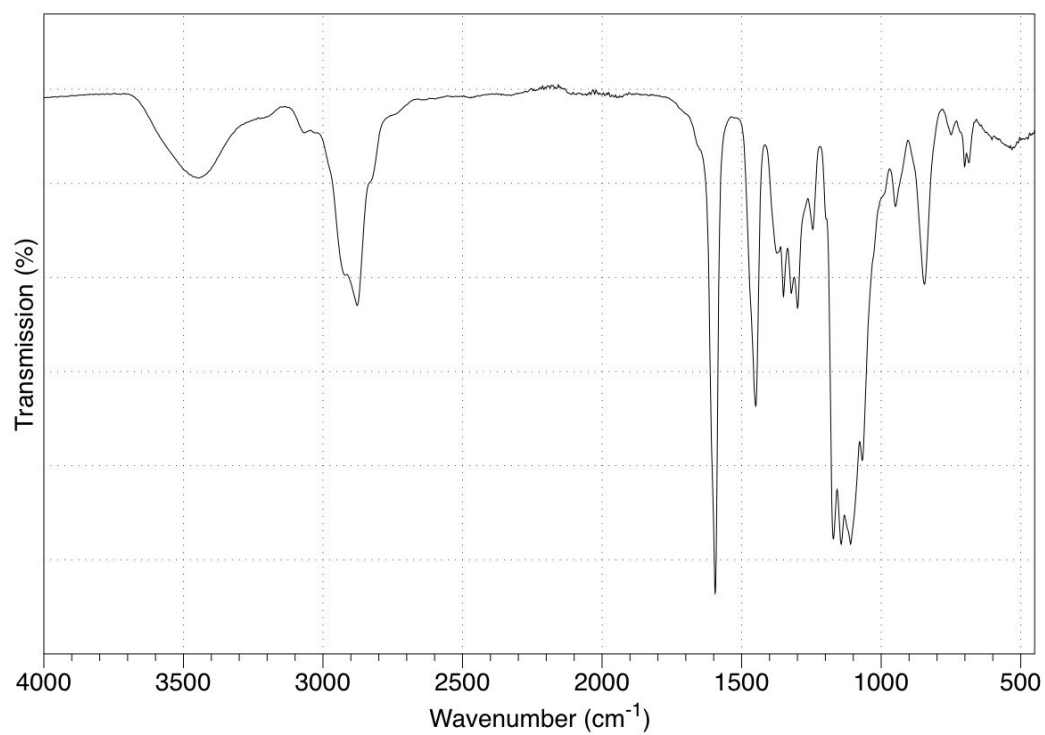

**Figure S3d.** IR spectrum (neat) of **DAPG3<sup>2+</sup>**.

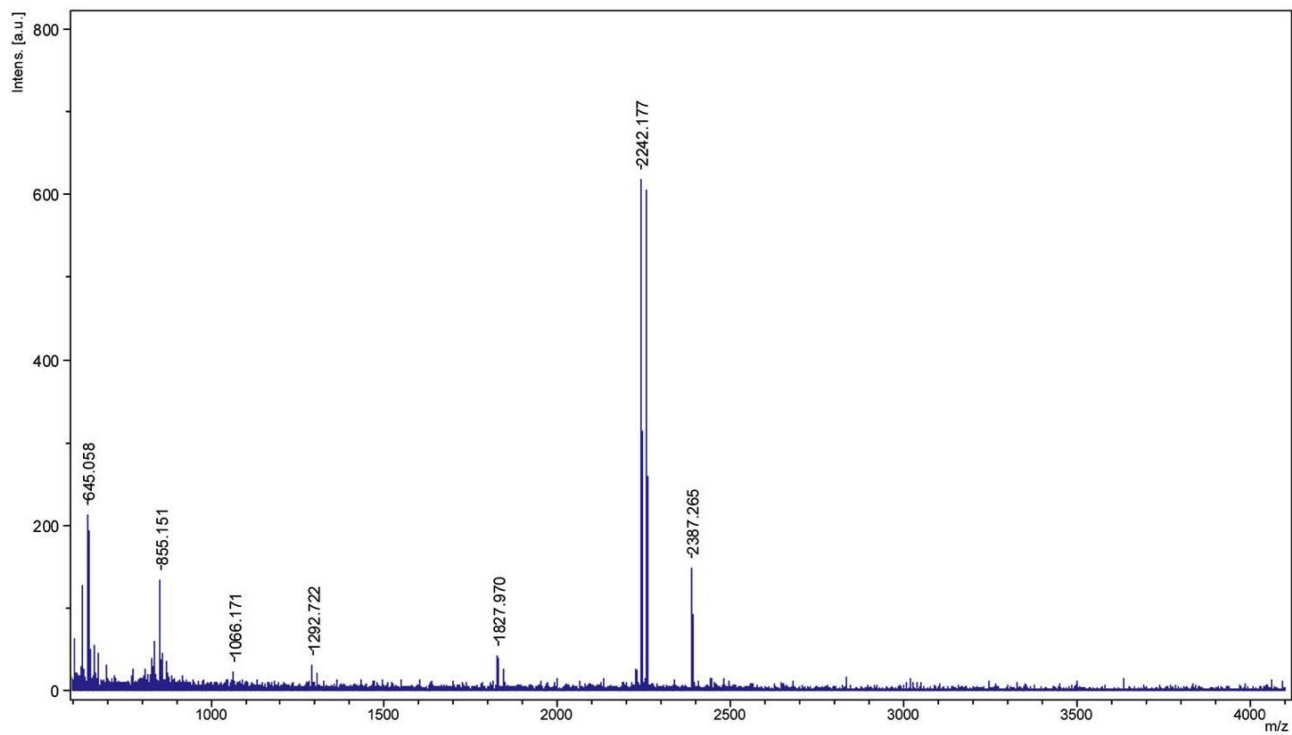

**Figure S3e.** MALDI-TOF mass spectrum of **DAPG3<sup>2+</sup>**.



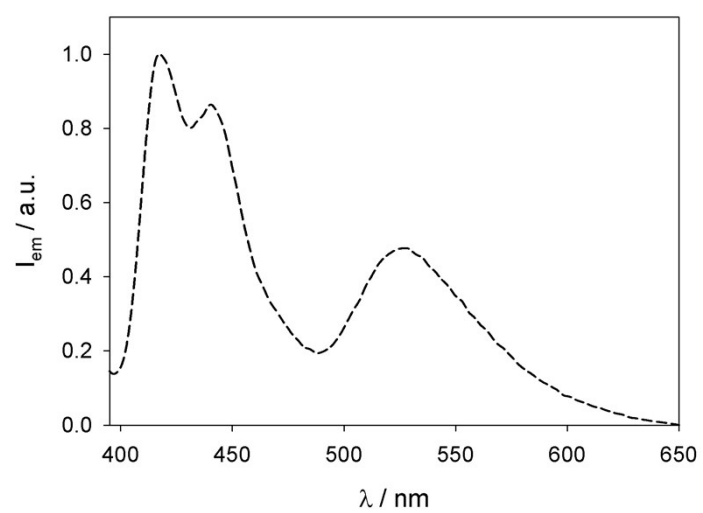

**Figure S4.** Emission spectrum of dendrimer **DAPG2<sup>2+</sup>** in water at 298 K.  $\lambda_{ex} = 335$  nm.
